**Kinematics of quadrupedal locomotion in sugar gliders (*Petaurus breviceps*):  
effects of age and substrate size**

Liza J. Shapiro and Jesse W. Young

10.1242/jeb.081224

There was an error published in *J. Exp. Biol.* **215**, 480-496.

On p. 481, the gestation length for *Petaurus breviceps* was incorrectly stated to be 16 weeks. The correct gestation length is 16 days. The authors apologise for any inconvenience that this error may have caused but assure readers that it does not affect the results or conclusions of the paper.
